# Supplementary material
Source: MDPI journal article supplement (https://www.mdpi.com/2071-1050/9/11/1998)
Supplement: s1 [file s1]

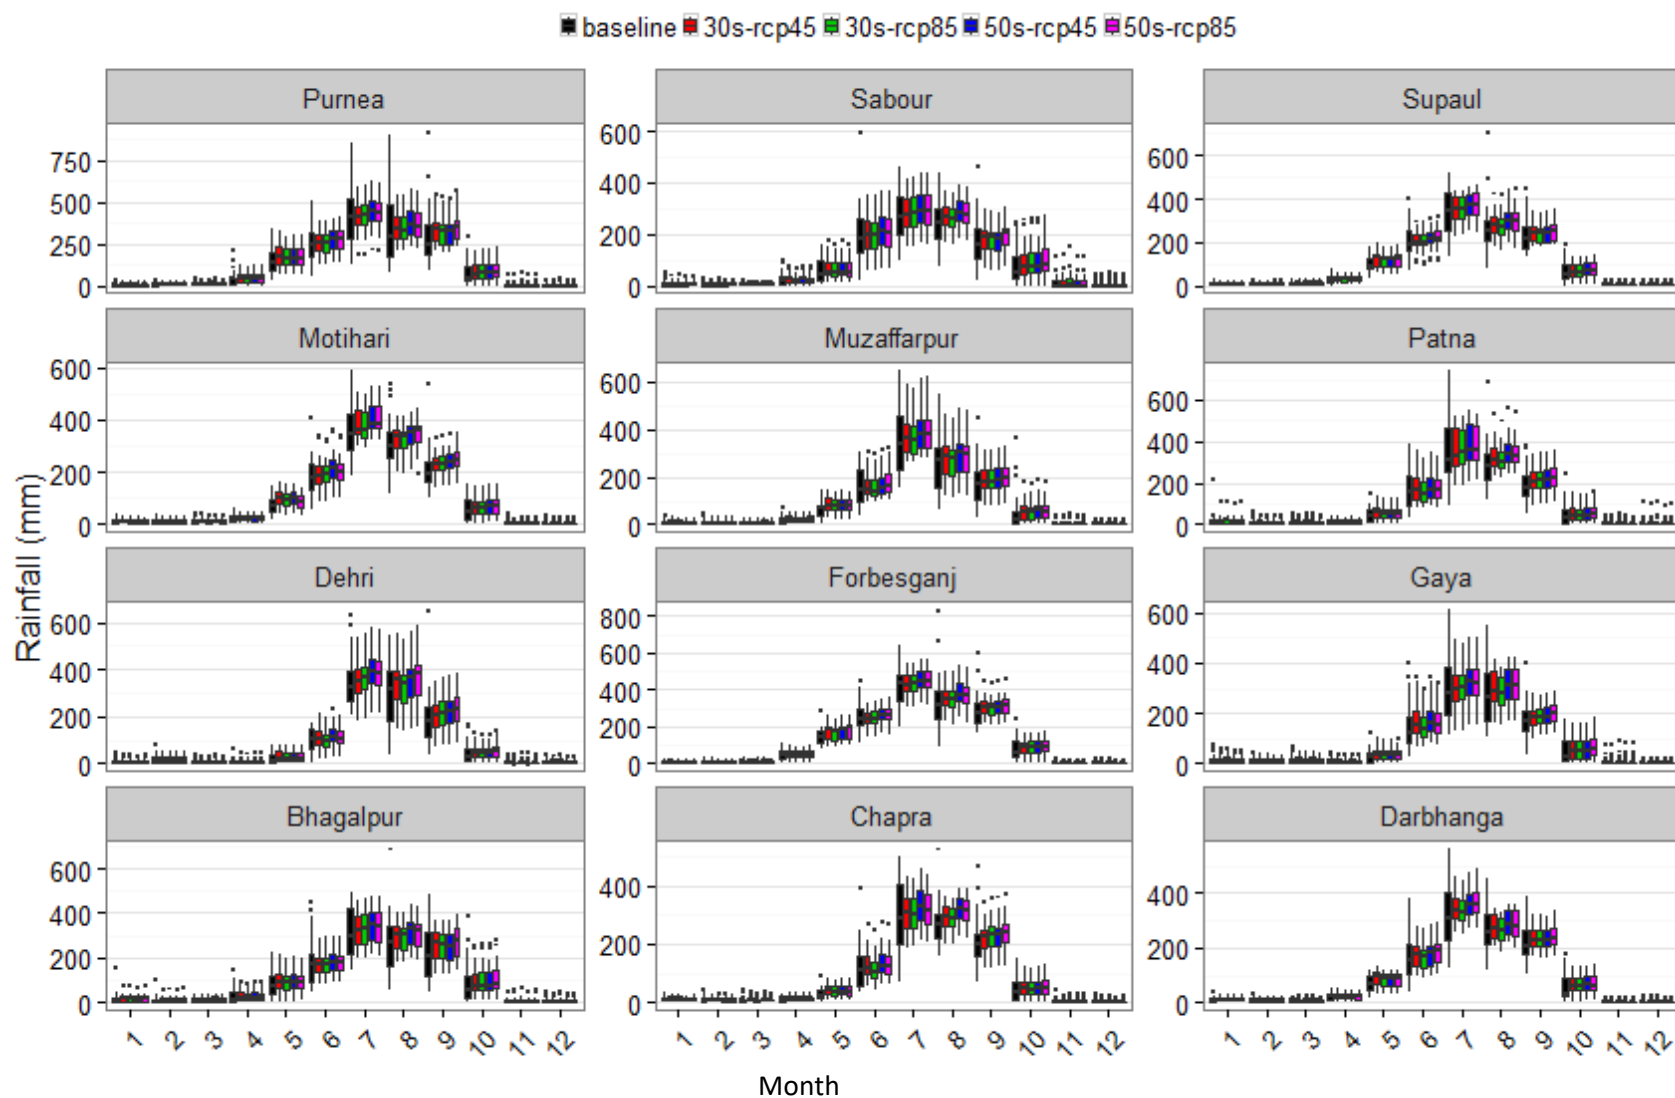

S1. Box plot of monthly rainfall amounts in the baseline period (1908-2009) and in 2030 and 2050 under two emission scenarios (rcp4.5 and rcp8.5) at 12 stations in Bihar, India.
